# Supplementary material
Source: publisher site journal article supplement (https://www.dovepress.com/article/220978)
Supplement: Supplementary file 1 [file get_supplementary_file.php]

Supplementary Table S1. Previous randomized controlled trials of TACE combined with tyrosine kinase inhibitor.

|  | Post-TACE15  Phase III (n=458) | | BRISK-TA16  Phase III (n=502) | | SPACE17  Phase II (n=307) | | ORIENTAL18  Phase III (n=888) | | TACE-219  Phase III (n=313) | | TACTICS20  Phase II (n=156) | |
| --- | --- | --- | --- | --- | --- | --- | --- | --- | --- | --- | --- | --- |
| Intervention | Sorafenib  (n=229) | Placebo  (n=227) | Brivanib  (n=249) | Placebo  (n=253) | Sorafenib  (n=154) | Placebo  (n=153) | Orantinib  (n=444) | Placebo  (n=444) | Sorafenib  (n=157) | Placebo  (n=156) | Sorafenib  (n=80) | TACE only  (n=76) |
| mOS, months | 29.7 | NR | 26.4 | 26.1 | NR | NR | 31.1 | 32.3 | 21.1 | 19.7 | N/A | N/A |
| HR (95%CI) | 1.06 (0.69-1.64) | | 0.90 (0.66-1.23) | | 0.90 (0.61-1.33) | | 1.09 (0.88-1.35) | | 0.91 (0.67-1.24) | | N/A | |
| mTTP, months | 5.4 | 3.7 | 8.4 | 4.9 | 5.6 | 5.5 | 2.9 | 2.5 | 10.8 | 10.6 | 26.7 | 16.4 |
| HR (95%CI) | 0.87 (0.70-1.09) | | 0.61 (0.48-0.77) | | 0.80 (0.59-1.08) | | 0.86 (0.74-0.99) | | 0.88 (0.67-1.17) | | 0.54 (0.35-0.83) | |
| mDOT, months | 4.3 | 5.0 | 6.0 | 6.6 | 5.3 | 6.8 | 10.9 | 12.3 | 4.0 | 5.4 | 9.7 | - |
| Primary endpoint | TTP | | OS | | TTP | | OS | | PFS | | OS/PFS | |
| Setting | Post-LDT | | Post-LDT | | Peri-LDT | | Post-LDT | | Peri-LDT | | Peri-LDT | |
| Intra-hepatic new lesions regard as progression or not  (evaluation criteria) | Progression  (RECICL) | | Not progression  (mRECIST) | | Progression  (mRECIST) | | Not progression (TACE discontinuation criteria) | | Progression (RECIST 1.1) | | Not progression  (RECICL) | |
| Inclusion criteria of tumor burden | ≤10 lesions | | - <3 lesion, at least one ≥5 cm - ≥4 lesions, at least one ≥2 cm | | Multinodular tumor without vascular invasion or extrahepatic spread | | - 1 lesion >5 cm - 2-3 lesions, at least one >3 cm - ≥4 lesions, at least one >1 cm | | Not a candidate for surgical resection or liver transplant | | - ≤10 lesions - ≤10 cm | |
| Stratification | - ECOG-PS (0 vs 1) - Response to TACE (CR vs non-CR) - Number of prior TACE (1 vs 2) | | - Study site - Child-Pugh class (A vs B) - ECOG-PS (0 vs 1) - Largest tumor size (<10 vs ≥10 cm) | | - Region - AFP (<400 vs ≥400 ng/L) | | - Region - Child-Pugh score (5 vs 6) - AFP (<400 vs ≥400 ng/L) - Largest tumor size (≤5 vs >5 cm) | | - Study site - AFP (<400 vs ≥400 ng/L) | | - Study site - Milan criteria (within vs beyond) - Number of prior TACE (0 vs 1-2) | |
| Abbreviations: mOS, median overall survival; mTTP, median time to progression; PFS, progression free survival; HR, hazard ratio; 95% CI, 95% confidence interval; mDOT, median duration of treatment; NR, not reached; N/A, not available; ECOG PS, Eastern Cooperative Oncology Group Performance Status; TACE, transarterial chemo-embolization | | | | | | | | | | | | |
